# Supplementary material
Source: PubMed Central journal article supplement (PMC7137387)
Supplement: NIHMS1576165-supplement-Supplementary_Information.pdf [file NIHMS1576165-supplement-Supplementary_Information.pdf]

## Supplemental Material and Methods

### Animals

The (wild-type control mice (C57BL/6) were purchased from the Jackson Laboratories (Bar Harbor, Maine). All knockout mice were generated in C57BL/6 background or were back-crossed more than 10 generations onto the C57BL/6 background; back-breeding was confirmed by examining a 110 marker panel specific for the C57BL/6 genetic background (Charles River Laboratories). TLR2<sup>-/-</sup>, TLR4<sup>-/-</sup>, MyD88<sup>-/-</sup>-mice, initially a kind gift of S. Akira (Osaka University, Osaka, Japan), were bred and maintained in our laboratory under specific-pathogen-free conditions and the genotype of the mice was confirmed by PCR (data not shown).
